# Supplementary material for: Geochemical Characteristics of Formation Water in Carbonate Reservoirs and Its Indication to Hydrocarbon Accumulation
Source: Hindawi journal article supplement (doi:10.1155/2022/6095178), 2022-10-11
Supplement: f1 [file 6095178.f1.pdf]

Supplementary Table 1. The ion concentrations of the formation water samples.

| number | PH   | cation (mg/l)   |                  |                  | anion (mg/l)    |                               |                               | TDS (mg/l) |
|--------|------|-----------------|------------------|------------------|-----------------|-------------------------------|-------------------------------|------------|
|        |      | Na <sup>+</sup> | Ca <sup>2+</sup> | Mg <sup>2+</sup> | Cl <sup>-</sup> | SO <sub>4</sub> <sup>2-</sup> | HCO <sub>3</sub> <sup>-</sup> |            |
| 1      | 5.75 | 1510.60         | 1826.85          | 277.01           | 6192.58         | 16.56                         | 301.63                        | 10108.67   |
| 2      | 6.33 | 4727.78         | 2947.08          | 297.92           | 12977.36        | 9.36                          | 674.32                        | 21624.46   |
| 3      | 6.19 | 11257.77        | 18110.15         | 313.84           | 49699.48        | 10.30                         | 1039.07                       | 80420.31   |
| 4      | 6.09 | 12124.40        | 25354.21         | 627.68           | 64786.82        | 56.00                         | 1001.51                       | 103894.62  |
| 5      | 6.08 | 8377.26         | 7307.39          | 277.01           | 26539.64        | 53.00                         | 183.60                        | 42684.91   |
| 6      | 6.55 | 1215.77         | 1473.54          | 297.92           | 5190.94         | 0.00                          | 272.73                        | 8450.90    |
| 7      | 5.88 | 7892.28         | 6385.35          | 595.84           | 25089.56        | 2.87                          | 185.95                        | 40148.97   |
| 8      | 5.79 | 7456.18         | 12770.69         | 297.92           | 34606.29        | 121.20                        | 595.05                        | 55726.13   |
| 9      | 6.38 | 18579.37        | 13753.05         | 893.76           | 55370.06        | 100.30                        | 347.11                        | 88943.35   |
| 10     | 5.49 | 17980.51        | 15226.59         | 595.84           | 56235.22        | 196.30                        | 260.33                        | 90298.50   |
| 11     | 6.11 | 9156.84         | 13261.87         | 595.84           | 38932.08        | 15.60                         | 652.21                        | 62598.83   |
| 12     | 5.96 | 19107.92        | 23801.91         | 841.53           | 73661.73        | 19.50                         | 1101.66                       | 118614.75  |
| 13     | 5.41 | 12888.12        | 19156.04         | 297.92           | 54982.07        | 0.00                          | 409.01                        | 87133.16   |
| 14     | 6.05 | 144.78          | 186444.86        | 297.92           | 35471.45        | 0.00                          | 1017.00                       | 56863.00   |
| 15     | 4.89 | 10686.43        | 7367.71          | 595.84           | 31145.66        | 45.30                         | 165.82                        | 49961.45   |
| 16     | 5.57 | 8987.48         | 20432.78         | 929.61           | 52664.52        | 56.30                         | 75.66                         | 83090.05   |
| 17     | 5.91 | 11296.83        | 10902.96         | 300.59           | 37374.61        | 78.20                         | 517.84                        | 60292.83   |
| 18     | 6.10 | 11338.36        | 11793.14         | 298.04           | 38924.81        | 16.30                         | 485.23                        | 62839.58   |
| 19     | 6.06 | 42244.39        | 35623.50         | 1939.09          | 133582.87       | 47.20                         | 345.23                        | 213735.08  |
| 20     | 6.09 | 5241.89         | 13753.05         | 595.84           | 33741.13        | 12.50                         | 696.43                        | 54028.33   |
| 21     | 5.53 | 2824.92         | 11297.15         | 595.84           | 25896.23        | 100.50                        | 309.52                        | 40923.65   |
| 22     | 5.76 | 557.75          | 11749.05         | 4337.63          | 33934.87        | 78.30                         | 618.13                        | 51197.43   |
| 23     | 6.62 | 15912.61        | 27402.70         | 831.04           | 75195.65        | 0.00                          | 393.43                        | 119735.43  |
| 24     | 5.77 | 23928.74        | 43607.04         | 2489.34          | 120997.94       | 18.30                         | 486.94                        | 191510.00  |
| 25     | 5.80 | 14983.58        | 38076.00         | 303.88           | 91065.73        | 52.10                         | 464.36                        | 144893.55  |
| 26     | 6.12 | 6400.67         | 21454.42         | 929.61           | 50470.16        | 14.90                         | 100.68                        | 79355.54   |
| 27     | 5.74 | 27654.52        | 24319.34         | 313.84           | 86086.60        | 19.50                         | 813.73                        | 139188.03  |
| 28     | 6.73 | 421.26          | 913.42           | 277.01           | 4653.96         | 17.20                         | 721.29                        | 4986.95    |
| 29     | 6.35 | 12481.79        | 30465.61         | 596.08           | 74549.22        | 0.00                          | 550.81                        | 118643.51  |
| 30     | 6.69 | 20515.72        | 23292.29         | 277.01           | 23426.34        | 14.50                         | 354.09                        | 117865.46  |
| 31     | 5.78 | 9475.31         | 30060.00         | 900.62           | 70219.36        | 25.30                         | 376.49                        | 111031.78  |
| 32     | 5.97 | 269.36          | 4460.30          | 901.78           | 10649.89        | 27.30                         | 491.28                        | 16772.61   |
| 33     | 5.76 | 19354.73        | 28216.32         | 311.17           | 80377.20        | 31.20                         | 474.13                        | 128733.55  |
| 34     | 6.14 | 9742.11         | 23547.00         | 607.75           | 58150.41        | 32.80                         | 501.58                        | 92548.85   |
| 35     | 5.58 | 10589.43        | 19539.00         | 303.88           | 51567.34        | 39.80                         | 351.48                        | 82351.13   |
| 36     | 5.57 | 10029.08        | 8920.61          | 601.19           | 32837.16        | 65.40                         | 265.56                        | 52653.59   |
| 37     | 6.85 | 18687.78        | 12775.90         | 894.12           | 53249.45        | 39.80                         | 1311.44                       | 86918.69   |
| 38     | 6.17 | 2166.31         | 12787.92         | 277.01           | 26539.64        | 87.10                         | 393.43                        | 42164.32   |
| 39     | 5.78 | 22470.31        | 24048.00         | 303.88           | 37899.60        | 67.20                         | 275.81                        | 124997.60  |
| 40     | 6.08 | 968.23          | 11874.50         | 277.01           | 13001.02        | 98.50                         | 524.58                        | 36645.34   |
| 41     | 6.00 | 23598.23        | 3447.69          | 2767.69          | 105204.97       | 45.60                         | 391.14                        | 166438.85  |
| 42     | 7.07 | 28.75           | 6129.84          | 1549.03          | 15360.48        | 48.90                         | 75.66                         | 23143.76   |
| 43     | 5.52 | 3803.51         | 5030.04          | 610.18           | 16532.46        | 21.50                         | 12.81                         | 25989.00   |
| 44     | 6.31 | 6967.16         | 2515.02          | 915.27           | 17402.40        | 16.50                         | 782.28                        | 28582.13   |
| 45     | 5.30 | 1191.63         | 4024.03          | 610.18           | 10441.44        | 17.80                         | 504.76                        | 16772.04   |
| 46     | 6.27 | 1359.99         | 3521.03          | 305.09           | 8701.20         | 19.60                         | 883.57                        | 14770.88   |
| 47     | 7.02 | 229.08          | 1509.01          | 610.18           | 4350.42         | 27.30                         | 757.26                        | 7455.95    |

|    |      |          |          |         |           |       |         |           |
|----|------|----------|----------|---------|-----------|-------|---------|-----------|
| 48 | 6.22 | 1722.01  | 1006.01  | 305.09  | 5220.72   | 29.60 | 176.96  | 8430.79   |
| 49 | 7.01 | 864.80   | 2012.02  | 610.18  | 6091.02   | 21.40 | 999.51  | 10577.53  |
| 50 | 6.26 | 1186.48  | 2587.16  | 941.53  | 8874.91   | 16.90 | 475.72  | 14065.79  |
| 51 | 5.54 | 11289.77 | 12775.90 | 298.04  | 40824.57  | 0.00  | 78.69   | 65266.97  |
| 52 | 6.85 | 781.37   | 1474.14  | 298.04  | 4437.45   | 0.00  | 419.66  | 7410.66   |
| 53 | 6.45 | 316.08   | 6879.33  | 298.04  | 13312.36  | 18.60 | 367.20  | 21173.02  |
| 54 | 6.60 | 333.09   | 7370.71  | 298.04  | 14154.48  | 17.80 | 459.00  | 22615.32  |
| 55 | 6.67 | 5674.16  | 17198.33 | 298.04  | 39809.46  | 36.50 | 393.43  | 63373.42  |
| 56 | 5.90 | 8334.40  | 10047.66 | 277.01  | 30962.92  | 37.90 | 799.98  | 50421.96  |
| 57 | 6.75 | 53055.74 | 4110.40  | 831.04  | 91119.44  | 53.20 | 603.26  | 149719.88 |
| 58 | 6.62 | 452.37   | 2740.27  | 277.01  | 6192.58   | 32.90 | 275.40  | 9937.64   |
| 59 | 6.15 | 338.88   | 4110.40  | 831.04  | 9731.20   | 37.80 | 836.51  | 15848.03  |
| 60 | 6.07 | 6343.53  | 5480.54  | 277.01  | 19462.40  | 25.10 | 1407.46 | 32970.95  |
| 61 | 4.92 | 2562.42  | 3929.44  | 297.92  | 11221.70  | 24.90 | 942.73  | 18954.22  |
| 62 | 6.85 | 8387.21  | 8841.25  | 595.84  | 30212.26  | 55.30 | 159.34  | 48195.89  |
| 63 | 6.09 | 254.21   | 982.36   | 297.92  | 2589.62   | 6.10  | 703.73  | 4827.35   |
| 64 | 7.04 | 654.15   | 1964.72  | 297.92  | 5179.25   | 12.90 | 298.47  | 8394.50   |
| 65 | 6.08 | 5677.66  | 5894.16  | 297.92  | 19853.77  | 0.00  | 331.63  | 32055.15  |
| 66 | 6.12 | 2273.47  | 7858.89  | 297.92  | 18127.36  | 12.60 | 254.25  | 28811.89  |
| 67 | 6.48 | 2502.27  | 1473.54  | 297.92  | 6921.26   | 62.50 | 707.48  | 11902.47  |
| 68 | 5.32 | 9303.81  | 5894.16  | 297.92  | 25089.56  | 98.60 | 939.62  | 41525.08  |
| 69 | 5.72 | 2865.89  | 19156.04 | 595.84  | 39797.23  | 45.90 | 420.07  | 62835.07  |
| 70 | 5.98 | 4696.65  | 10314.79 | 595.84  | 26819.87  | 75.60 | 694.22  | 43121.37  |
| 71 | 6.31 | 1358.21  | 1964.72  | 297.92  | 6056.10   | 0.00  | 657.03  | 10333.98  |
| 72 | 5.66 | 5321.28  | 8841.25  | 595.84  | 25089.56  | 15.60 | 843.98  | 40690.91  |
| 73 | 6.44 | 1208.05  | 5894.16  | 297.92  | 12977.36  | 23.60 | 309.92  | 20687.42  |
| 74 | 5.80 | 4498.03  | 24067.84 | 1191.68 | 52774.59  | 17.50 | 359.51  | 82891.65  |
| 75 | 5.95 | 191.32   | 15717.77 | 297.92  | 28550.19  | 36.40 | 719.02  | 45476.22  |
| 76 | 5.36 | 3937.69  | 5937.25  | 277.01  | 16808.44  | 0.00  | 983.58  | 27943.98  |
| 77 | 7.30 | 3776.14  | 6669.31  | 622.34  | 19142.64  | 12.40 | 499.75  | 30710.18  |
| 78 | 5.06 | 22974.47 | 34225.11 | 2168.94 | 102037.51 | 0.00  | 416.16  | 161822.19 |
| 79 | 5.63 | 4065.34  | 26032.56 | 297.92  | 13142.21  | 0.00  | 24.38   | 83612.41  |
| 80 | 5.95 | 2571.92  | 4913.81  | 298.04  | 13312.36  | 14.90 | 367.20  | 21463.34  |
| 81 | 6.53 | 753.01   | 913.42   | 277.01  | 3538.62   | 0.00  | 78.69   | 5560.75   |
| 82 | 6.76 | 238.36   | 913.42   | 277.01  | 2653.96   | 0.00  | 236.06  | 4318.82   |
| 83 | 6.23 | 2923.06  | 5023.83  | 277.01  | 14154.48  | 12.90 | 78.69   | 22457.06  |
| 84 | 5.85 | 4459.96  | 8220.81  | 277.01  | 22116.37  | 23.50 | 185.89  | 35260.04  |
| 85 | 6.07 | 4803.52  | 11417.79 | 277.01  | 28308.95  | 27.60 | 172.61  | 44979.89  |
| 86 | 6.09 | 8009.24  | 29962.00 | 595.84  | 66466.98  | 21.40 | 1062.24 | 106096.30 |
| 87 | 6.64 | 305.89   | 2455.90  | 297.92  | 5179.25   | 36.50 | 93.03   | 8331.49   |
| 88 | 5.73 | 4771.59  | 18664.86 | 893.76  | 5743.57   | 0.00  | 743.57  | 118446.40 |
| 89 | 5.81 | 4436.15  | 47644.50 | 2681.27 | 98405.66  | 23.50 | 917.51  | 154085.09 |
| 90 | 5.61 | 24515.35 | 18664.86 | 297.92  | 41646.22  | 27.60 | 44.22   | 115168.56 |
| 91 | 5.80 | 23490.11 | 17682.49 | 297.92  | 48193.39  | 12.40 | 276.36  | 109940.27 |
| 92 | 5.56 | 6092.44  | 38803.25 | 1489.60 | 82189.94  | 11.40 | 320.58  | 128895.80 |
| 93 | 5.34 | 22991.60 | 28488.46 | 893.76  | 88246.04  | 26.50 | 331.63  | 140951.49 |
| 94 | 5.36 | 17932.76 | 27506.10 | 297.92  | 36999.00  | 33.50 | 287.41  | 123023.19 |
| 95 | 5.30 | 7828.11  | 41210.04 | 2383.35 | 8706.67   | 0.00  | 359.51  | 143487.68 |
| 96 | 5.33 | 11706.56 | 34873.81 | 2681.27 | 87380.88  | 12.60 | 297.52  | 136940.05 |
| 97 | 5.35 | 17366.91 | 33400.27 | 1787.51 | 90841.51  | 16.50 | 384.30  | 143780.50 |

|     |      |          |          |         |          |       |        |           |
|-----|------|----------|----------|---------|----------|-------|--------|-----------|
| 98  | 5.54 | 22412.76 | 28488.46 | 893.76  | 87380.88 | 0.00  | 285.13 | 139460.99 |
| 99  | 5.65 | 11161.21 | 37820.89 | 2383.35 | 90841.51 | 11.80 | 371.90 | 142578.86 |
| 100 | 5.93 | 13900.26 | 35414.11 | 1787.51 | 89111.20 | 24.80 | 297.52 | 140510.62 |

---
